# Supplementary material for: Intermittent streamflow generation in a merokarst headwater catchment
Source: Royal Society of Chemistry journal article supplement (doi:10.1039/d2va00191h), 2022-11-23
Supplement: d2va00191h2.pdf [file d2va00191h2.pdf]

Table S13, Hatley et al.

| Sample ID         | Date/Time     | Location | pH   | Temperature (C) | Dissolved Oxygen (mg/L) | Specific Conductivity (uS/cm) | Alkalinity (meq/L) | Alkalinity (as mg/L CaCO3) | F- (mg/L) | Cl- (mg/L) |
|-------------------|---------------|----------|------|-----------------|-------------------------|-------------------------------|--------------------|----------------------------|-----------|------------|
| 20210415_1-1_1230 | 4/15/21 12:30 | stream   | 6.59 | 13.9            | 9.8                     | 481.5                         | 5.52               | 276.2                      | 0.45      | 2.94       |
| 20210506_1-1_1533 | 5/6/21 15:33  | stream   | 6.94 | 19.1            | 8.0                     | 568.5                         | 5.70               | 285.3                      | 0.44      | 3.18       |
| 20210507_1-1_1321 | 5/7/21 13:21  | stream   | 7.04 | 13.7            | 8.1                     | 570.9                         | 5.25               | 262.9                      | 0.43      | 2.89       |
| 20210508_1-1_1312 | 5/8/21 13:12  | stream   | 7.38 | 22.8            | 5.4                     | 574.6                         | 5.72               | 286.4                      | 0.42      | 3.63       |
| 20210508_1-1_2148 | 5/8/21 21:48  | stream   | 7.02 | 16.9            | 5.9                     | 1020.0                        | 4.07               | 203.9                      | 0.31      | 2.87       |
| 20210508_1-1_2240 | 5/8/21 22:40  | stream   | 7.11 | 15.4            | 5.5                     | 813.1                         | 5.67               | 283.8                      | 0.39      | 6.54       |
| 20210508_1-1_2325 | 5/8/21 23:25  | stream   | 7.05 | 15.6            | 4.4                     | 554.3                         | 4.25               | 212.8                      | 0.33      | 25.49      |
| 20210509_1-1_0010 | 5/9/21 0:10   | stream   | 7.02 | 15.0            | 5.6                     | 589.1                         | 4.09               | 204.9                      | 0.32      | 40.07      |
| 20210509_1-1_0120 | 5/9/21 1:20   | stream   | 7.07 | 15.6            | 5.9                     | 606.5                         | 4.68               | 234.3                      | 0.38      | 27.12      |
| 20210509_1-1_0241 | 5/9/21 2:41   | stream   | 7.62 | 14.6            | 5.1                     | 564.1                         | 4.84               | 242.0                      | 0.40      | 11.94      |
| 20210509_1-1_0442 | 5/9/21 4:42   | stream   | 7.01 | 14.0            | 5.2                     | 827.7                         | 5.23               | 261.8                      | 0.39      | 68.02      |
| 20210510_1-1_1010 | 5/10/21 10:10 | stream   | 7.83 | 12.9            | 4.8                     | 568.7                         | 5.34               | 267.3                      | 0.44      | 3.01       |
| 20210512_1-1_1610 | 5/12/21 16:10 | stream   | 7.87 | 17.4            | 2.5                     | 558.0                         | 5.16               | 258.3                      | 0.43      | 2.93       |
| 20210514_1-1_1738 | 5/14/21 17:38 | stream   | 7.93 | 17.7            | 2.0                     | n.a.*                         | 5.49               | 274.9                      | 0.45      | 3.13       |
| 20210522_1-1_1808 | 5/22/21 18:08 | stream   | 7.97 | 17.0            | 1.9                     | 524.9                         | 5.73               | 287.0                      | 0.42      | 2.77       |
| 20210523_1-1_1842 | 5/23/21 18:42 | stream   | 7.93 | 16.8            | 8.8                     | 564.9                         | 5.51               | 275.9                      | 0.38      | 2.91       |
| 20210524_1-1_1331 | 5/24/21 13:31 | stream   | 8.08 | 17.3            | 8.8                     | 500.3                         | 5.46               | 273.2                      | 0.42      | 9.12       |
| 20210526_1-1_1012 | 5/26/21 10:12 | stream   | 8.06 | 16.3            | 8.9                     | 505.8                         | 5.75               | 287.7                      | 0.39      | 3.67       |
| 20210526_1-1_2041 | 5/26/21 20:41 | stream   | 7.77 | 15.7            | 8.7                     | 508.1                         | 5.75               | 287.8                      | 0.42      | 2.71       |
| 20210526_1-1_2140 | 5/26/21 21:40 | stream   | 7.88 | 15.7            | 9.2                     | 506.9                         | 5.74               | 287.2                      | 0.42      | 2.83       |
| 20210526_1-1_2300 | 5/26/21 23:00 | stream   | 7.84 | 15.7            | 8.6                     | 493.4                         | 5.66               | 283.3                      | 0.42      | 2.85       |
| 20210527_1-1_0000 | 5/27/21 0:00  | stream   | 7.81 | 15.8            | 8.7                     | 505.8                         | 5.67               | 283.8                      | 0.43      | 2.73       |
| 20210527_1-1_0100 | 5/27/21 1:00  | stream   | 7.90 | 15.7            | 8.6                     | 489.5                         | 5.70               | 285.0                      | 0.42      | 2.92       |
| 20210527_1-1_0200 | 5/27/21 2:00  | stream   | 7.92 | 15.4            | 8.7                     | 475.1                         | 5.36               | 268.3                      | 0.40      | 2.82       |
| 20210527_1-1_0330 | 5/27/21 3:30  | stream   | 7.86 | 15.3            | 8.7                     | 491.8                         | 5.45               | 272.9                      | 0.42      | 2.87       |
| 20210528_1-1_0929 | 5/28/21 9:29  | stream   | 7.88 | 13.3            | 9.7                     | 496.9                         | 5.52               | 276.2                      | 0.42      | 9.76       |
| 20210531_1-1_1754 | 5/31/21 17:54 | stream   | 7.80 | 14.6            | 9.2                     | 502.2                         | 5.91               | 295.9                      | 0.43      | 2.75       |
| 20210601_1-1_1150 | 6/1/21 11:50  | stream   | 7.93 | 14.9            | 9.4                     | 508.0                         | 5.64               | 282.2                      | 0.43      | 2.90       |
| 20210608_1-1_1711 | 6/8/21 17:11  | stream   | 7.84 | 21.5            | 8.8                     | 504.6                         | 5.61               | 280.9                      | 0.42      | 2.77       |
| 20210611_1-1_1332 | 6/11/21 13:32 | stream   | 7.61 | 20.6            | n.a.                    | 515.0                         | 5.73               | 286.5                      | 0.43      | 3.04       |
| 20210611_1-1_1429 | 6/11/21 14:29 | stream   | 7.68 | 19.8            | n.a.                    | 538.0                         | 5.79               | 289.9                      | 0.40      | 2.81       |
| 20210611_1-1_1530 | 6/11/21 15:30 | stream   | 7.83 | 20.5            | n.a.                    | 525.0                         | 5.85               | 292.8                      | 0.43      | 3.12       |
| 20210614_1-1_1619 | 6/14/21 16:19 | stream   | 7.62 | 20.3            | n.a.                    | 535.0                         | 5.85               | 292.9                      | 0.42      | 3.43       |
| 20210622_1-1_1234 | 6/22/21 12:34 | stream   | 7.46 | 24.2            | n.a.                    | 530.0                         | 5.35               | 267.9                      | 0.39      | 2.29       |
| 20210624_1-1_1945 | 6/24/21 19:45 | stream   | 8.04 | 26.9            | n.a.                    | 511.0                         | 5.27               | 263.7                      | 0.37      | 2.31       |
| 20210624_1-1_2046 | 6/24/21 20:46 | stream   | 8.01 | 26.4            | n.a.                    | 500.0                         | 5.62               | 281.2                      | 0.28      | 1.94       |
| 20210624_1-1_2140 | 6/24/21 21:40 | stream   | 8.05 | 25.4            | n.a.                    | 515.0                         | 5.62               | 281.3                      | 0.37      | 2.32       |
| 20210625_1-1_1525 | 6/25/21 15:25 | stream   | 7.87 | 28.1            | n.a.                    | 530.0                         | 5.83               | 291.6                      | 0.38      | 1.84       |
| 20210626_1-1_1900 | 6/26/21 19:00 | stream   | n.d. | n.d.            | n.a.                    | n.a.                          | 4.89               | 244.7                      | 0.38      | 2.05       |
| 20210627_1-1_1607 | 6/27/21 16:07 | stream   | 8.07 | 27.0            | n.a.                    | 510.0                         | 1.44               | 72.3                       | 0.38      | 2.01       |
| 20210629_1-1_1735 | 6/29/21 17:35 | stream   | 8.15 | 26.4            | 8.0                     | 526.5                         | 4.81               | 240.7                      | 0.55      | 3.32       |
| 20210701_1-1_1015 | 7/1/21 10:15  | stream   | 8.17 | 21.3            | 8.5                     | 540.3                         | 5.06               | 253.1                      | 0.47      | 3.45       |
| 20210715_1-1_1245 | 7/15/21 12:45 | stream   | 8.16 | 21.3            | 7.7                     | 441.2                         | 4.32               | 216.2                      | 0.37      | 2.60       |
| 20210716_1-1_1537 | 7/16/21 15:37 | stream   | 8.12 | 24.6            | 8.2                     | 558.0                         | 5.74               | 287.1                      | 0.42      | 2.58       |

\*n.a. indicates that the parameter was not determined

Table S13 continued, Hatley et al.

| Sample ID         | NO2- (mg/L) | Br- (mg/L) | NO3- (mg/L) | SO4-- (mg/L) | Na+ (mg/L) | NH4+ (mg/L) | K+ (mg/L) | Mg++ (mg/L) | Ca++ (mg/L) | Sr++ (mg/L) | NPOC (mg/L) | TN (mg/L) |
|-------------------|-------------|------------|-------------|--------------|------------|-------------|-----------|-------------|-------------|-------------|-------------|-----------|
| 20210415_1-1_1230 | <0.71       | <0.06      | <0.59       | 27.67        | 4.19       | <0.24       | 0.55      | 16.20       | 88.74       | 3.40        | n.a.        | n.a.      |
| 20210506_1-1_1533 | < 0.71      | <0.06      | <0.59       | 31.02        | 4.35       | <0.24       | 1.06      | 16.36       | 91.41       | 3.28        | n.a.        | n.a.      |
| 20210507_1-1_1321 | < 0.71      | <0.06      | <0.59       | 31.20        | 4.12       | <0.24       | 0.80      | 16.28       | 94.50       | 3.28        | n.a.        | n.a.      |
| 20210508_1-1_1312 | < 0.71      | <0.06      | <0.59       | 30.88        | 4.50       | <0.24       | 3.90      | 16.66       | 86.81       | 3.36        | n.a.        | n.a.      |
| 20210508_1-1_2148 | < 0.71      | <0.06      | 0.65        | 23.03        | 3.32       | <0.24       | 2.17      | 10.80       | 58.51       | 2.16        | 5.81        | <0.95     |
| 20210508_1-1_2240 | < 0.71      | <0.06      | <0.59       | 29.20        | 4.06       | <0.24       | 1.63      | 15.01       | 78.32       | 3.12        | 3.35        | <0.95     |
| 20210508_1-1_2325 | < 0.71      | <0.06      | <0.59       | 24.01        | 7.54       | <0.24       | 29.14     | 12.25       | 62.35       | 2.48        | 3.43        | <0.95     |
| 20210509_1-1_0010 | < 0.71      | <0.06      | <0.59       | 23.31        | 9.15       | <0.24       | 42.61     | 11.52       | 61.36       | 2.42        | 5.45        | <0.95     |
| 20210509_1-1_0120 | < 0.71      | <0.06      | <0.59       | 28.66        | 8.01       | <0.24       | 30.80     | 14.29       | 69.54       | 2.94        | 5.12        | <0.95     |
| 20210509_1-1_0241 | < 0.71      | <0.06      | <0.59       | 31.81        | 5.56       | <0.24       | 12.58     | 14.93       | 76.12       | 3.02        | 4.51        | <0.95     |
| 20210509_1-1_0442 | < 0.71      | <0.06      | <0.59       | 32.52        | 14.21      | <0.24       | 69.65     | 15.77       | 82.22       | 3.21        | 3.85        | <0.95     |
| 20210510_1-1_1010 | < 0.71      | <0.06      | <0.59       | 33.24        | 4.25       | <0.24       | 0.95      | 16.41       | 86.64       | 3.35        | 1.51        | <0.95     |
| 20210512_1-1_1610 | < 0.71      | <0.06      | <0.59       | 33.27        | 4.43       | <0.24       | 1.18      | 16.59       | 86.04       | 3.41        | 1.70        | <0.95     |
| 20210514_1-1_1738 | < 0.71      | <0.06      | <0.59       | 34.03        | 5.84       | <0.24       | 1.07      | 16.55       | 88.77       | 3.33        | 1.61        | <0.95     |
| 20210522_1-1_1808 | < 0.71      | <0.06      | <0.59       | 12.92        | 3.62       | <0.24       | 1.38      | 14.82       | 87.16       | 3.39        | 1.61        | <0.95     |
| 20210523_1-1_1842 | < 0.71      | <0.06      | <0.59       | 12.99        | 4.01       | <0.24       | 1.58      | 15.14       | 88.64       | 3.49        | 1.52        | <0.95     |
| 20210524_1-1_1331 | < 0.71      | <0.06      | 0.60        | 13.51        | 3.57       | <0.24       | 1.18      | 15.27       | 86.50       | 3.27        | 1.87        | <0.95     |
| 20210526_1-1_1012 | < 0.71      | <0.06      | <0.59       | 13.95        | 4.03       | <0.24       | 0.80      | 15.80       | 87.72       | 2.92        | 1.60        | <0.95     |
| 20210526_1-1_2041 | < 0.71      | <0.06      | <0.59       | 14.74        | 3.96       | <0.24       | 1.52      | 15.51       | 87.49       | 3.34        | 2.83        | <0.95     |
| 20210526_1-1_2140 | < 0.71      | <0.06      | <0.59       | 14.72        | 4.29       | <0.24       | 1.79      | 15.38       | 88.48       | 3.52        | 2.93        | <0.95     |
| 20210526_1-1_2300 | < 0.71      | <0.06      | <0.59       | 14.78        | 3.74       | <0.24       | 1.30      | 15.43       | 89.39       | 3.27        | 2.60        | <0.95     |
| 20210527_1-1_0000 | < 0.71      | <0.06      | <0.59       | 15.06        | 3.81       | <0.24       | 1.32      | 15.56       | 88.11       | 3.64        | 2.62        | <0.95     |
| 20210527_1-1_0100 | < 0.71      | <0.06      | <0.59       | 14.74        | 3.69       | <0.24       | 1.32      | 15.07       | 86.90       | 3.33        | 2.84        | <0.95     |
| 20210527_1-1_0200 | < 0.71      | <0.06      | 0.68        | 13.95        | 3.67       | <0.24       | 1.52      | 14.55       | 93.75       | 3.19        | 3.74        | <0.95     |
| 20210527_1-1_0330 | < 0.71      | <0.06      | <0.59       | 13.95        | 3.59       | <0.24       | 1.42      | 14.94       | 85.03       | 3.21        | 3.24        | <0.95     |
| 20210528_1-1_0929 | < 0.71      | <0.06      | <0.59       | 13.32        | 3.62       | <0.24       | 1.25      | 14.91       | 87.39       | 3.25        | 1.54        | <0.95     |
| 20210531_1-1_1754 | < 0.71      | <0.06      | <0.59       | 13.84        | 3.63       | <0.24       | 1.30      | 15.21       | 88.68       | 3.41        | 3.29        | 17.32     |
| 20210601_1-1_1150 | < 0.71      | <0.06      | <0.59       | 13.85        | 3.39       | <0.24       | 1.22      | 15.70       | 88.34       | 3.46        | 2.86        | 21.70     |
| 20210608_1-1_1711 | < 0.71      | <0.06      | <0.59       | 16.48        | 3.51       | <0.24       | 1.10      | 16.28       | 88.87       | 3.23        | 2.39        | <0.95     |
| 20210611_1-1_1332 | < 0.71      | <0.06      | <0.59       | 18.12        | 3.58       | <0.24       | 1.57      | 16.47       | 89.92       | 3.33        | 3.65        | <0.95     |
| 20210611_1-1_1429 | < 0.71      | <0.06      | <0.59       | 18.13        | 3.67       | <0.24       | 1.47      | 16.41       | 88.55       | 3.52        | 2.89        | <0.95     |
| 20210611_1-1_1530 | < 0.71      | <0.06      | <0.59       | 18.42        | 3.49       | <0.24       | 1.22      | 16.15       | 89.59       | 3.45        | 2.87        | <0.95     |
| 20210614_1-1_1619 | < 0.71      | <0.06      | <0.59       | 20.00        | 3.87       | <0.24       | 1.31      | 16.79       | 87.28       | 3.55        | 2.84        | <0.95     |
| 20210622_1-1_1234 | < 0.71      | <0.06      | <0.59       | 29.91        | 4.14       | <0.24       | 1.29      | 17.81       | 85.98       | 3.41        | 2.58        | 9.24      |
| 20210624_1-1_1945 | < 0.71      | <0.06      | <0.59       | 31.18        | 4.09       | <0.24       | 1.34      | 17.84       | 80.00       | 3.49        | 2.39        | <0.95     |
| 20210624_1-1_2046 | < 0.71      | <0.06      | <0.59       | 25.33        | 3.98       | <0.24       | 1.56      | 16.85       | 76.82       | 3.21        | 3.91        | <0.95     |
| 20210624_1-1_2140 | < 0.71      | <0.06      | 0.84        | 30.23        | 4.14       | <0.24       | 1.56      | 17.42       | 77.22       | 3.47        | 3.63        | <0.95     |
| 20210625_1-1_1525 | < 0.71      | <0.06      | <0.59       | 31.53        | 4.10       | <0.24       | 1.40      | 17.84       | 84.85       | 3.49        | 2.98        | <0.95     |
| 20210626_1-1_1900 | < 0.71      | <0.06      | <0.59       | 31.47        | 4.53       | <0.24       | 1.50      | 17.79       | 80.95       | 3.57        | 2.88        | <0.95     |
| 20210627_1-1_1607 | < 0.71      | <0.06      | <0.59       | 31.94        | 4.21       | <0.24       | 1.49      | 17.97       | 80.15       | 3.41        | 2.80        | <0.95     |
| 20210629_1-1_1735 | < 0.71      | <0.06      | <0.59       | 29.89        | 4.09       | <0.24       | 1.74      | 17.41       | 83.18       | 3.43        | 2.68        | 1.99      |
| 20210701_1-1_1015 | < 0.71      | <0.06      | <0.59       | 30.10        | 2.55       | <0.24       | 1.08      | 11.39       | 54.41       | 2.35        | 2.56        | <0.95     |
| 20210715_1-1_1245 | < 0.71      | <0.06      | <0.59       | 19.35        | 2.98       | <0.24       | 2.34      | 12.47       | 71.07       | 2.77        | 5.62        | <0.95     |
| 20210716_1-1_1537 | < 0.71      | <0.06      | <0.59       | 30.35        | 4.60       | <0.24       | 1.35      | 18.18       | 89.89       | 3.74        | 2.08        | <0.95     |

\*n.a. indicates that the parameter was not determined

Table S13 continued, Hatley et al.

| Sample ID         | $\delta D$ (per mil VSMOW) | $\delta^{18}O$ (per mil VSMOW) | Discharge (m <sup>3</sup> /s) |
|-------------------|----------------------------|--------------------------------|-------------------------------|
| 20210415_1-1_1230 | n.d.                       | n.d.                           | 0.007879                      |
| 20210506_1-1_1533 | -35                        | -5.5                           | 0.001961                      |
| 20210507_1-1_1321 | -36                        | -5.6                           | 0.001713                      |
| 20210508_1-1_1312 | -35                        | -5.6                           | 0.001782                      |
| 20210508_1-1_2148 | -31                        | -5.1                           | 0.001876                      |
| 20210508_1-1_2240 | -33                        | -5.4                           | 0.002596                      |
| 20210508_1-1_2325 | -27                        | -4.5                           | 0.003203                      |
| 20210509_1-1_0010 | -26                        | -4.4                           | 0.005646                      |
| 20210509_1-1_0120 | -29                        | -4.8                           | 0.006071                      |
| 20210509_1-1_0241 | -30                        | -4.9                           | 0.005163                      |
| 20210509_1-1_0442 | -32                        | -5.1                           | 0.004047                      |
| 20210510_1-1_1010 | -35                        | -5.6                           | 0.002843                      |
| 20210512_1-1_1610 | -36                        | -5.7                           | 0.001966                      |
| 20210514_1-1_1738 | -35                        | -5.5                           | 0.001864                      |
| 20210522_1-1_1808 | -35                        | -5.5                           | 0.042168                      |
| 20210523_1-1_1842 | -35                        | -5.7                           | 0.035750                      |
| 20210524_1-1_1331 | -35                        | -5.7                           | 0.032618                      |
| 20210526_1-1_1012 | -35                        | -5.7                           | 0.028131                      |
| 20210526_1-1_2041 | -35                        | -5.7                           | 0.027247                      |
| 20210526_1-1_2140 | -35                        | -5.7                           | 0.027427                      |
| 20210526_1-1_2300 | -35                        | -5.7                           | 0.027969                      |
| 20210527_1-1_0000 | -35                        | -5.7                           | 0.029254                      |
| 20210527_1-1_0100 | -35                        | -5.6                           | 0.041249                      |
| 20210527_1-1_0200 | -33                        | -5.4                           | 0.041709                      |
| 20210527_1-1_0330 | -34                        | -5.5                           | 0.075230                      |
| 20210528_1-1_0929 | -35                        | -5.6                           | 0.037331                      |
| 20210531_1-1_1754 | -35                        | -5.6                           | 0.036524                      |
| 20210601_1-1_1150 | -35                        | -5.5                           | 0.032699                      |
| 20210608_1-1_1711 | -35                        | -5.6                           | 0.016582                      |
| 20210611_1-1_1332 | -35                        | -5.6                           | 0.012581                      |
| 20210611_1-1_1429 | -35                        | -5.5                           | 0.012705                      |
| 20210611_1-1_1530 | -35                        | -5.6                           | 0.012832                      |
| 20210614_1-1_1619 | -35                        | -5.6                           | 0.009065                      |
| 20210622_1-1_1234 | -35                        | -5.5                           | 0.001753                      |
| 20210624_1-1_1945 | -35                        | -5.5                           | 0.002200                      |
| 20210624_1-1_2046 | -33                        | -5.3                           | 0.002455                      |
| 20210624_1-1_2140 | -34                        | -5.5                           | 0.001800                      |
| 20210625_1-1_1525 | -35                        | -5.6                           | 0.002027                      |
| 20210626_1-1_1900 | -35                        | -5.6                           | 0.002018                      |
| 20210627_1-1_1607 | -35                        | -5.5                           | 0.001449                      |
| 20210629_1-1_1735 | -34                        | -5.4                           | 0.001079                      |
| 20210701_1-1_1015 | n.a.                       | n.a.                           | 0.001268                      |
| 20210715_1-1_1245 | -28                        | -4.9                           | 0.017658                      |
| 20210716_1-1_1537 | -34                        | -5.5                           | 0.003581                      |

\*n.a. indicates that the parameter was not determined
