# Supplementary material for: Intermittent streamflow generation in a merokarst headwater catchment
Source: Royal Society of Chemistry journal article supplement (doi:10.1039/d2va00191h), 2022-11-23
Supplement: d2va00191h3.pdf [file d2va00191h3.pdf]

Table S14, Hatley et al.

| Sample ID              | Date/Time     | Well      | pH   | Temperature (C) | Dissolved Oxygen (mg/L) | Specific Conductivity (uS/cm) | Depth to Water (ft) | Total Depth (ft) | Alkalinity (meq/L) | Alkalinity (as mg/L CaCO3) | F- (mg/L) | Cl- (mg/L) | NO2- (mg/L) | Br- (mg/L) |
|------------------------|---------------|-----------|------|-----------------|-------------------------|-------------------------------|---------------------|------------------|--------------------|----------------------------|-----------|------------|-------------|------------|
| 20200625_3-5MOR        | 6/25/20 14:27 | 3-5 MOR   | 7.04 | 19.4            | n.a.*                   | 488.7                         | 20.60               | 22.40            | 6.2                | 310.20                     | 0.47      | 3.33       | <0.71       | <0.06      |
| 20200806_3-5MOR        | 8/6/20 9:56   | 3-5 MOR   | 6.65 | 16.7            | n.a.                    | 655.3                         | 20.80               | 22.40            | 6.8                | 338.80                     | 0.47      | 3.25       | <0.71       | <0.06      |
| 20200902_3-5MOR        | 9/2/20 8:55   | 3-5 MOR   | 6.89 | 17.7            | 6.7                     | 682.8                         | 20.81               | 22.45            | 7.1                | 354.50                     | 0.42      | 2.45       | <0.71       | <0.06      |
| 20201102_3-5MOR        | 11/2/20 13:13 | 3-5 MOR   | 6.8  | 17.4            | 7.4                     | 773.6                         | 20.12               | 22.45            | 6.9                | 347.40                     | 0.38      | 2.88       | <0.71       | <0.06      |
| 20201201_3-5MOR        | 12/1/20 13:01 | 3-5 MOR   | 6.67 | 13.2            | 7.7                     | 761.3                         | 20.90               | 22.45            | 6.5                | 328.00                     | 0.42      | 3.17       | <0.71       | <0.06      |
| 20210223_3-5MOR        | 2/23/21 16:22 | 3-5 MOR   | 6.92 | 9.6             | n.a.                    | 689.5                         | 20.22               | 22.45            | 6.3                | 313.60                     | 0.77      | 4.37       | <0.71       | <0.06      |
| 20210415_3-5MOR        | 4/15/21 16:00 | 3-5 MOR   | 6.56 | 13.1            | 7.3                     | 573.4                         | 17.54               | 22.47            | 5.5                | 275.90                     | 0.49      | 3.27       | <0.71       | <0.06      |
| 20210526_3-5MOR        | 5/26/21 12:30 | 3-5 MOR   | 7.35 | 15.8            | 4.8                     | 528.2                         | 18.59               | 22.45            | 5.7                | 287.20                     | 0.56      | 4.20       | <0.71       | <0.06      |
| 20210707_3-5MOR        | 7/7/21 10:30  | 3-5 MOR   | 7.26 | 17.4            | 6.2                     | 832.0                         | 20.55               | 22.45            | 7.2                | 360.80                     | 0.60      | 3.63       | <0.71       | <0.06      |
| 20210820_3-5MOR        | 8/20/21 11:25 | 3-5 MOR   | 7.05 | 19.1            | 6.0                     | 634.1                         | 21.01               | 22.44            | 6.8                | 338.60                     | 0.43      | 2.95       | <0.71       | <0.06      |
| 20200806_3-5-1MOR      | 8/6/20 13:35  | 3-5-1 MOR | 6.75 | 18.4            | n.a.                    | 656.4                         | 35.10               | 41.60            | 6.3                | 317.20                     | 0.35      | 4.08       | <0.71       | <0.06      |
| 20200921_3-5-1MOR      | 9/21/20 10:54 | 3-5-1 MOR | 7.14 | 15.9            | 7.3                     | n.a.                          | 35.85               | 41.35            | 6.5                | 326.80                     | 0.41      | 3.68       | <0.71       | <0.06      |
| 20201012_3-5-1MOR      | 10/12/20 9:16 | 3-5-1 MOR | 6.89 | 13.3            | 1.9                     | 649.9                         | 35.92               | 41.25            | 6.2                | 309.40                     | 0.40      | 3.88       | <0.71       | <0.06      |
| 20201102_3-5-1MOR      | 11/2/20 12:08 | 3-5-1 MOR | 6.94 | 16.2            | 1.7                     | 649.4                         | 35.85               | 41.20            | 6.3                | 313.90                     | 0.35      | 3.43       | <0.71       | <0.06      |
| 20201201_3-5-1MOR      | 12/1/20 12:21 | 3-5-1 MOR | 6.65 | 12.7            | 2.3                     | 596.6                         | 35.66               | 41.25            | 6.2                | 310.60                     | 0.39      | 3.70       | <0.71       | <0.06      |
| 20210223_3-5-1MOR      | 2/23/21 15:53 | 3-5-1 MOR | 6.85 | 13.8            | n.a.                    | 1416.0                        | 35.24               | 41.25            | 6.3                | 312.70                     | 0.39      | 4.10       | <0.71       | <0.06      |
| 20210415_3-5-1MOR      | 4/15/21 15:40 | 3-5-1 MOR | 6.6  | 13.8            | 3.3                     | 698.1                         | 32.77               | 41.31            | 6.4                | 318.30                     | 0.39      | 3.90       | <0.71       | <0.06      |
| 20210526_3-5-1MOR      | 5/26/21 12:15 | 3-5-1 MOR | 7.3  | 16.8            | 2.1                     | 605.7                         | 33.40               | 41.30            | 6.3                | 315.60                     | 0.46      | 4.89       | <0.71       | <0.06      |
| 20210707_3-5-1MOR      | 7/7/21 10:10  | 3-5-1 MOR | 7.2  | 15.7            | 1.2                     | 670.0                         | 34.71               | 41.26            | 6.4                | 317.90                     | 0.53      | 3.95       | <0.71       | <0.06      |
| 20210820_3-5-1MOR      | 8/20/21 11:50 | 3-5-1 MOR | 7.18 | 15.3            | 1.7                     | 637.0                         | 35.31               | 41.34            | 6.4                | 321.50                     | 0.35      | 3.91       | <0.71       | <0.06      |
| 20200806_4-6EIS1       | 8/6/20 12:41  | 4-6 EIS 1 | 6.72 | 16.0            | n.a.                    | 581.8                         | 22.20               | 25.80            | 5.8                | 288.70                     | 0.42      | 3.23       | <0.71       | <0.06      |
| 20200914_4-6EIS1       | 9/14/20 13:11 | 4-6 EIS 1 | 6.95 | 17.7            | n.a.                    | 747.5                         | 22.45               | 24.85            | 6.7                | 336.50                     | 0.43      | 2.85       | <0.71       | <0.06      |
| 20201102_4-6EIS1       | 11/2/20 10:45 | 4-6 EIS 1 | 6.99 | 14.2            | n.a.                    | 736.5                         | 22.40               | 25.00            | 5.9                | 292.90                     | 0.47      | 3.16       | <0.71       | <0.06      |
| 20201201_4-6EIS1       | 12/1/20 11:20 | 4-6 EIS 1 | 6.78 | 12.1            | 7.6                     | 556.2                         | 22.35               | 24.90            | 5.8                | 289.00                     | 0.47      | 3.06       | <0.71       | <0.06      |
| 20210223_4-6EIS1       | 2/23/21 15:03 | 4-6 EIS 1 | 6.8  | 14.6            | n.a.                    | 1216.0                        | 22.29               | 24.99            | 6.0                | 297.70                     | 3.43      | 11.61      | <0.71       | <0.06      |
| 20210415_4-6EIS1       | 4/15/21 14:19 | 4-6 EIS 1 | n.a. | n.a.            | 7.0                     | n.a.                          | 22.07               | 24.96            | 6.2                | 308.60                     | 0.78      | 3.90       | <0.71       | <0.06      |
| 20210508_4-6EIS1_1343  | 5/8/21 13:43  | 4-6 EIS 1 | n.a. | n.a.            | n.a.                    | n.a.                          | 22.00               | 24.95            | 5.9                | 293.90                     | 0.43      | 3.32       | <0.71       | <0.06      |
| 20210510_4-6EIS1_1112  | 5/10/21 11:12 | 4-6 EIS 1 | 7.01 | 13.5            | 5.0                     | 870.5                         | 22.82               | 24.97            | 5.8                | 288.60                     | 0.48      | 4.21       | <0.71       | <0.06      |
| 20210526_4-6EIS1_1110  | 5/26/21 11:10 | 4-6 EIS 1 | 7.41 | 16.6            | 6.4                     | 563.2                         | 20.70               | 24.98            | 6.1                | 303.40                     | 0.45      | 3.96       | <0.71       | <0.06      |
| 20210528_4-6EIS1_1010  | 5/28/21 10:10 | 4-6 EIS 1 | 7.15 | 12.5            | 5.0                     | 668.5                         | 21.58               | 24.98            | 6.0                | 302.40                     | 0.48      | 5.78       | <0.71       | <0.06      |
| 20210701_4-6EIS1_1040  | 7/1/21 10:40  | 4-6 EIS 1 | 7.37 | 15.5            | 7.6                     | 593.6                         | 22.16               | 24.95            | 5.8                | 292.00                     | 0.75      | 4.09       | <0.71       | <0.06      |
| 20210707_4-6EIS1_0930  | 7/7/21 9:30   | 4-6 EIS 1 | 7.46 | 15.8            | 6.8                     | 607.0                         | 22.24               | 24.93            | 5.9                | 292.70                     | 0.64      | 3.84       | <0.71       | <0.06      |
| 20210820_4-6EIS1_0942  | 8/20/21 9:42  | 4-6 EIS 1 | 7.5  | 16.3            | n.a.                    | 544.7                         | 23.21               | 24.97            | 6.7                | 334.30                     | 0.43      | 2.80       | <0.71       | <0.06      |
| 20210820_4-6EIS1       | 8/20/21 9:42  | 4-6 EIS 1 | 7.5  | 16.3            | n.a.                    | 544.7                         | 23.21               | 24.97            | 6.7                | 334.30                     | 0.43      | 2.80       | <0.71       | <0.06      |
| 20200806_4-6EIS2       | 8/6/20 13:16  | 4-6 EIS 2 | 6.89 | 17.8            | n.a.                    | 566.8                         | 18.60               | 16.50            | 7.6                | 379.10                     | 0.42      | 4.92       | <0.71       | <0.06      |
| 20200901_4-6EIS2       | 9/1/20 14:45  | 4-6 EIS 2 | 6.93 | 19.8            | 9.2                     | 557.3                         | 16.50               | 18.52            | 6.0                | 298.70                     | 0.36      | 2.39       | <0.71       | <0.06      |
| 20200914_4-6EIS2       | 9/14/20 13:16 | 4-6 EIS 2 | 6.81 | 16.5            | 7.1                     | 726.3                         | 16.55               | 18.50            | 8.3                | 416.00                     | 0.38      | 2.35       | <0.71       | <0.06      |
| 20201102_4-6EIS2       | 11/2/20 10:10 | 4-6 EIS 2 | 6.78 | 15.6            | 6.9                     | 642.3                         | 16.55               | 18.60            | 6.8                | 340.00                     | 0.34      | 2.35       | <0.71       | <0.06      |
| 20201201_4-6EIS2       | 12/1/20 11:50 | 4-6 EIS 2 | 6.72 | 13.4            | 5.8                     | 671.3                         | 14.52               | 16.52            | 6.6                | 329.70                     | 0.40      | 2.78       | <0.71       | <0.06      |
| 20210223_4-6EIS2       | 2/23/21 15:31 | 4-6 EIS 2 | 6.69 | 15.7            | n.a.                    | 551.2                         | 16.63               | 18.55            | 6.3                | 314.30                     | 0.48      | 2.97       | <0.71       | <0.06      |
| 20210415_4-6EIS2_1450  | 4/15/21 14:50 | 4-6 EIS 2 | 6.74 | 14.7            | 7.5                     | 1855.0                        | 16.12               | 18.57            | 6.1                | 303.50                     | 0.42      | 2.82       | <0.71       | <0.06      |
| 20210508_4_6_EIS2_1420 | 5/8/21 14:20  | 4-6 EIS 2 | 6.84 | 17.2            | 6.1                     | 604.6                         | 16.14               | 18.51            | 5.9                | 296.50                     | 0.42      | 4.15       | <0.71       | <0.06      |
| 20210510_4-6EIS2_1145  | 5/10/21 11:45 | 4-6 EIS 2 | 7.05 | 13.3            | 3.8                     | 636.4                         | 16.15               | 18.55            | 5.7                | 283.10                     | 0.44      | 3.00       | <0.71       | <0.06      |
| 20210526_4-6EIS2_1144  | 5/26/21 11:44 | 4-6 EIS 2 | 7.2  | 16.7            | 5.2                     | 506.0                         | 15.51               | 18.54            | 5.6                | 280.20                     | 0.42      | 3.35       | <0.71       | <0.06      |
| 20210528_4-6EIS2_1030  | 5/28/21 10:30 | 4-6 EIS 2 | 6.96 | 12.5            | 5.8                     | 492.2                         | 15.07               | 18.55            | 5.4                | 271.20                     | 0.37      | 3.04       | <0.71       | <0.06      |
| 20210701_4-6EIS2_1050  | 7/1/21 10:50  | 4-6 EIS 2 | 7.2  | 15.1            | 6.3                     | 561.5                         | 16.35               | 18.55            | 3.9                | 195.70                     | 0.51      | 3.30       | <0.71       | <0.06      |
| 20210707_4-6EIS2_0945  | 7/7/21 9:45   | 4-6 EIS 2 | 7.14 | 14.4            | 6.4                     | 572.0                         | 16.46               | 18.53            | 5.9                | 293.20                     | 0.54      | 3.15       | <0.71       | <0.06      |
| 20210820_4-6EIS2       | 8/20/21 10:10 | 4-6 EIS 2 | 7.08 | 17.6            | 6.4                     | 532.5                         | 16.58               | 18.57            | 5.6                | 280.50                     | 0.36      | 2.97       | <0.71       | <0.06      |
| 20200625_4-6MOR        | 6/25/20 11:35 | 4-6 MOR   | 7.19 | 20.2            | n.a.                    | 459.2                         | 38.60               | 41.80            | 6.0                | 300.90                     | 0.43      | 3.73       | <0.71       | <0.06      |
| 20200806_4-6MOR        | 8/6/20 12:10  | 4-6 MOR   | 6.8  | 16.9            | 6.8                     | 625.5                         | 39.40               | 41.80            | 6.6                | 331.90                     | 0.42      | 3.27       | <0.71       | <0.06      |
| 20200901_4-6MOR        | 9/1/20 12:03  | 4-6 MOR   | 6.81 | 15.8            | 8.3                     | 652.4                         | 39.50               | 41.75            | 7.0                | 349.30                     | 0.42      | 2.50       | <0.71       | <0.06      |
| 20200914_4-6MOR_B      | 9/14/20 9:37  | 4-6 MOR   | 7.03 | 15.4            | 6.5                     | 686.2                         | 39.60               | 41.74            | 6.9                | 346.00                     | 0.40      | 2.83       | <0.71       | <0.06      |
| 20201102_4-6MOR        | 11/2/20 11:12 | 4-6 MOR   | 6.77 | 15.3            | n.a.                    | 987.9                         | 39.65               | 41.75            | 7.0                | 349.70                     | 0.37      | 60.60      | <0.71       | <0.06      |
| 20201201_4-6MOR        | 12/1/20 10:54 | 4-6 MOR   | 6.84 | 13.0            | 7.7                     | 661.4                         | 39.45               | 40.75            | 6.5                | 323.40                     | 0.40      | 3.33       | <0.71       | <0.06      |
| 20210223_4-6MOR        | 2/23/21 14:33 | 4-6 MOR   | 6.98 | 13.6            | n.a.                    | 657.8                         | 38.42               | 41.75            | 5.9                | 296.00                     | 0.36      | 3.10       | <0.71       | <0.06      |
| 20210415_4-6MOR_1347   | 4/15/21 13:47 | 4-6 MOR   | 6.42 | 14.2            | 5.3                     | 509.5                         | 37.30               | 41.70            | 5.6                | 281.50                     | 0.47      | 3.27       | <0.71       | <0.06      |
| 20210508_4-6MOR_1354   | 5/8/21 13:54  | 4-6 MOR   | 6.72 | 16.1            | 5.0                     | 680.2                         | 37.51               | 41.80            | 5.8                | 289.00                     | 0.45      | 3.35       | <0.71       | <0.06      |
| 20210510_4-6MOR_1120   | 5/10/21 11:20 | 4-6 MOR   | 7.13 | 12.9            | 2.5                     | 729.3                         | 38.01               | 41.82            | 5.9                | 293.50                     | 0.46      | 3.26       | <0.71       | <0.06      |
| 20210526_4-6MOR_1202   | 5/26/21 12:02 | 4-6 MOR   | 7.35 | 15.6            | 3.2                     | 540.4                         | 37.55               | 41.80            | 6.0                | 300.70                     | 0.44      | 3.38       | <0.71       | <0.06      |
| 20210528_4-6MOR_1017   | 5/28/21 10:17 | 4-6 MOR   | 7.24 | 13.0            | 4.4                     | 549.6                         | 37.70               | 41.66            | 5.9                | 292.90                     | 0.45      | 5.90       | <0.71       | <0.06      |
| 20210701_4-6MOR_1030   | 7/1/21 10:30  | 4-6 MOR   | 7.35 | 16.0            | 5.6                     | 670.2                         | 38.56               | 41.82            | 6.4                | 321.00                     | 0.61      | 3.76       | <0.71       | <0.06      |
| 20210707_4-6MOR_0912   | 7/7/21 9:12   | 4-6 MOR   | 7.2  | 16.2            | 4.7                     | 662.0                         | 38.62               | 41.78            | 7.0                | 351.40                     | 0.62      | 3.85       | <0.71       | <0.06      |
| 20210820_4-6MOR        | 8/20/21 9:40  | 4-6 MOR   | 7.06 | 18.1            | 5.4                     | 616.8                         | 39.88               | 41.80            | 6.6                | 332.30                     | 0.41      | 3.39       | <0.71       | <0.06      |

\*n.a. indicates that the parameter was not determined

Table S14 continued, Hatley et al.

| Sample ID              | NO3- (mg/L) | SO4-- (mg/L) | Na+ (mg/L) | NH4+ (mg/L) | K+ (mg/L) | Mg++ (mg/L) | Ca++ (mg/L) | Sr++ (mg/L) | δD (per mil VSMOW) | δ18O (per mil VSMOW) |
|------------------------|-------------|--------------|------------|-------------|-----------|-------------|-------------|-------------|--------------------|----------------------|
| 20200625_3-5MOR        | <0.59       | 17.39        | 4.78       | <0.24       | 2.38      | 21.10       | 98.07       | 4.23        | n.a.               | n.a.                 |
| 20200806_3-5MOR        | <0.59       | 23.44        | 5.12       | n.a.        | 2.07      | 19.89       | 99.27       | 4.41        | n.a.               | n.a.                 |
| 20200902_3-5MOR        | 0.74        | 30.18        | 4.14       | <0.24       | 1.04      | 19.35       | 100.38      | 4.06        | n.a.               | n.a.                 |
| 20201102_3-5MOR        | <0.59       | 38.23        | 4.79       | <0.24       | 1.04      | 20.62       | 110.65      | 4.76        | n.a.               | n.a.                 |
| 20201201_3-5MOR        | <0.59       | 44.15        | 5.30       | <0.24       | 1.05      | 20.10       | 117.32      | 4.90        | n.a.               | n.a.                 |
| 20210223_3-5MOR        | <0.59       | 56.75        | 5.56       | <0.24       | 1.42      | 20.12       | 98.36       | 3.89        | n.a.               | n.a.                 |
| 20210415_3-5MOR        | <0.59       | 27.36        | 4.82       | <0.24       | 1.20      | 16.42       | 86.04       | 3.56        | n.a.               | n.a.                 |
| 20210526_3-5MOR        | <0.59       | 15.55        | 5.06       | <0.24       | 0.76      | 16.82       | 92.11       | 3.07        | n.a.               | n.a.                 |
| 20210707_3-5MOR        | <0.59       | 22.25        | 5.45       | <0.24       | 1.60      | 17.47       | 99.74       | 3.55        | n.a.               | n.a.                 |
| 20210820_3-5MOR        | <0.59       | 30.06        | 6.11       | <0.24       | 2.36      | 20.05       | 110.15      | 3.81        | n.a.               | n.a.                 |
| 20200806_3-5-1MOR      | <0.59       | 42.60        | 6.81       | <0.24       | 1.70      | 28.54       | 86.79       | 5.09        | n.a.               | n.a.                 |
| 20200921_3-5-1MOR      | <0.59       | 42.35        | 6.51       | 0.25        | 1.93      | 33.58       | 89.87       | 4.91        | n.a.               | n.a.                 |
| 20201012_3-5-1MOR      | <0.59       | 43.59        | 6.72       | ND          | 1.31      | 32.59       | 104.71      | 5.27        | n.a.               | n.a.                 |
| 20201102_3-5-1MOR      | <0.59       | 39.89        | 6.52       | ND          | 1.35      | 27.27       | 84.06       | 4.95        | n.a.               | n.a.                 |
| 20201201_3-5-1MOR      | <0.59       | 40.11        | 7.15       | <0.24       | 1.12      | 27.78       | 86.98       | 5.04        | n.a.               | n.a.                 |
| 20210223_3-5-1MOR      | <0.59       | 43.92        | 7.77       | <0.24       | 1.85      | 26.72       | 83.73       | 4.53        | n.a.               | n.a.                 |
| 20210415_3-5-1MOR      | <0.59       | 40.50        | 7.07       | <0.24       | 1.54      | 27.44       | 90.08       | 4.55        | n.a.               | n.a.                 |
| 20210526_3-5-1MOR      | <0.59       | 42.86        | 7.71       | <0.24       | 1.22      | 29.49       | 91.96       | 4.30        | n.a.               | n.a.                 |
| 20210707_3-5-1MOR      | <0.59       | 41.68        | 6.81       | <0.24       | 1.17      | 28.43       | 94.57       | 4.30        | n.a.               | n.a.                 |
| 20210820_3-5-1MOR      | <0.59       | 41.23        | 6.17       | 0.29        | 1.55      | 27.11       | 88.12       | 4.16        | n.a.               | n.a.                 |
| 20200806_4-6EIS1       | 1.07        | 18.81        | 6.87       | n.a.        | 2.02      | 24.62       | 76.69       | 4.50        | n.a.               | n.a.                 |
| 20200914_4-6EIS1       | 1.48        | 21.92        | 6.76       | n.a.        | 2.40      | 25.51       | 77.22       | 4.15        | n.a.               | n.a.                 |
| 20201102_4-6EIS1       | 0.92        | 20.35        | 6.87       | n.a.        | 1.97      | 24.51       | 75.27       | 4.23        | n.a.               | n.a.                 |
| 20201201_4-6EIS1       | 1.05        | 21.82        | 7.22       | <0.24       | 1.07      | 26.03       | 76.01       | 4.28        | n.a.               | n.a.                 |
| 20210223_4-6EIS1       | 1.49        | 19.84        | 9.48       | <0.24       | 4.10      | 22.47       | 71.05       | 3.92        | n.a.               | n.a.                 |
| 20210415_4-6EIS1       | 1.65        | 19.32        | 7.81       | <0.24       | 2.12      | 24.07       | 75.47       | 3.89        | n.a.               | n.a.                 |
| 20210508_4-6EIS1_1343  | 0.95        | 22.87        | 7.55       | <0.24       | 1.73      | 25.29       | 76.48       | 3.90        | -37                | -5.8                 |
| 20210510_4-6EIS1_1112  | 1.39        | 22.08        | 7.92       | <0.24       | 2.20      | 25.15       | 72.40       | 4.01        | -38                | -6                   |
| 20210526_4-6EIS1_1110  | 1.67        | 19.45        | 8.09       | <0.24       | 1.37      | 26.11       | 78.07       | 3.70        | -38                | -6.2                 |
| 20210528_4-6EIS1_1010  | 1.17        | 22.24        | 8.35       | <0.24       | 2.40      | 27.82       | 77.37       | 4.48        | -37                | -5.8                 |
| 20210701_4-6EIS1_1040  | 1.38        | 19.04        | 6.69       | <0.24       | 1.85      | 25.34       | 77.95       | 4.35        | n.a.               | n.a.                 |
| 20210707_4-6EIS1_0930  | 1.78        | 20.69        | 7.83       | <0.24       | 1.60      | 25.23       | 88.74       | 3.93        | n.a.               | n.a.                 |
| 20210820_4-6EIS1_0942  | 1.30        | 20.07        | 6.66       | 0.28        | 1.74      | 25.08       | 78.33       | 3.54        | n.a.               | n.a.                 |
| 20210820_4-6EIS1       | 1.30        | 20.07        | 6.66       | 0.28        | 1.74      | 25.08       | 78.33       | 3.54        | n.a.               | n.a.                 |
| 20200806_4-6EIS2       | 0.68        | 13.95        | 4.69       | <0.24       | 3.44      | 15.10       | 105.65      | 3.92        | n.a.               | n.a.                 |
| 20200901_4-6EIS2       | 0.81        | 12.18        | 2.90       | 0.29        | 0.62      | 14.92       | 87.80       | 3.33        | n.a.               | n.a.                 |
| 20200914_4-6EIS2       | 0.73        | 10.99        | 3.46       | n.a.        | 1.23      | 15.81       | 90.02       | 3.64        | n.a.               | n.a.                 |
| 20201102_4-6EIS2       | <0.59       | 10.10        | 3.80       | 0.54        | 0.72      | 16.23       | 99.07       | 3.75        | n.a.               | n.a.                 |
| 20201201_4-6EIS2       | <0.59       | 11.65        | 6.70       | <0.24       | 0.47      | 15.31       | 97.08       | 3.72        | n.a.               | n.a.                 |
| 20210223_4-6EIS2       | <0.59       | 10.88        | 7.09       | <0.24       | 1.10      | 14.62       | 93.74       | 3.15        | n.a.               | n.a.                 |
| 20210415_4-6EIS2_1450  | <0.59       | 10.20        | 4.01       | <0.24       | 1.06      | 13.70       | 93.75       | 3.14        | n.a.               | n.a.                 |
| 20210508_4_6_EIS2_1420 | 0.69        | 15.80        | 6.12       | <0.24       | 4.69      | 16.09       | 86.95       | 3.17        | -36                | -5.7                 |
| 20210510_4-6EIS2_1145  | <0.59       | 14.84        | 4.08       | <0.24       | 1.04      | 15.42       | 87.55       | 3.25        | -36                | -5.7                 |
| 20210526_4-6EIS2_1144  | <0.59       | 6.90         | 3.97       | <0.24       | 0.51      | 10.53       | 92.18       | 2.53        | -34                | -5.5                 |
| 20210528_4-6EIS2_1030  | 0.93        | 6.10         | 3.03       | <0.24       | 0.96      | 9.13        | 95.97       | 2.82        | -34                | -5.3                 |
| 20210701_4-6EIS2_1050  | <0.59       | 12.89        | 4.82       | <0.24       | 1.43      | 14.11       | 90.85       | 2.90        | -35                | -5.6                 |
| 20210707_4-6EIS2_0945  | <0.59       | 11.20        | 4.03       | <0.24       | 0.74      | 13.71       | 96.99       | 3.05        | n.a.               | n.a.                 |
| 20210820_4-6EIS2       | 0.59        | 11.01        | 3.84       | 1.31        | 1.84      | 12.52       | 90.38       | 2.40        | n.a.               | n.a.                 |
| 20200625_4-6MOR        | 0.98        | 23.14        | 4.39       | n.a.        | 2.51      | 19.20       | 109.74      | 4.00        | n.a.               | n.a.                 |
| 20200806_4-6MOR        | <0.59       | 26.83        | 5.01       | <0.24       | 1.81      | 22.28       | 99.58       | 4.45        | n.a.               | n.a.                 |
| 20200901_4-6MOR        | 0.84        | 28.89        | 4.42       | n.a.        | 1.11      | 20.36       | 95.25       | 4.51        | n.a.               | n.a.                 |
| 20200914_4-6MOR_B      | <0.59       | 34.53        | 4.92       | n.a.        | 1.16      | 26.87       | 125.50      | 4.65        | n.a.               | n.a.                 |
| 20201102_4-6MOR        | <0.59       | 38.28        | 12.72      | n.a.        | 58.63     | 21.67       | 100.50      | 4.84        | n.a.               | n.a.                 |
| 20201201_4-6MOR        | <0.59       | 44.47        | 5.42       | <0.24       | 0.76      | 17.75       | 80.95       | 4.72        | n.a.               | n.a.                 |
| 20210223_4-6MOR        | <0.59       | 56.98        | 4.94       | <0.24       | 0.70      | 20.00       | 98.60       | 3.82        | n.a.               | n.a.                 |
| 20210415_4-6MOR_1347   | <0.59       | 30.89        | 4.92       | <0.24       | 0.76      | 17.92       | 86.62       | 3.64        | n.a.               | n.a.                 |
| 20210508_4-6MOR_1354   | <0.59       | 31.39        | 5.09       | <0.24       | 1.22      | 18.16       | 88.27       | 3.31        | -36                | -5.7                 |
| 20210510_4-6MOR_1120   | <0.59       | 31.72        | 4.95       | <0.24       | 1.09      | 18.14       | 89.22       | 3.79        | -36                | -5.7                 |
| 20210526_4-6MOR_1202   | <0.59       | 24.52        | 5.75       | <0.24       | 0.70      | 20.07       | 86.30       | 3.45        | -35                | -5.7                 |
| 20210528_4-6MOR_1017   | 0.77        | 21.07        | 5.28       | <0.24       | 1.62      | 18.34       | 86.91       | 3.82        | -34                | -5.3                 |
| 20210701_4-6MOR_1030   | <0.59       | 24.84        | 4.94       | <0.24       | 1.50      | 19.21       | 97.08       | 3.99        | -36                | -5.6                 |
| 20210707_4-6MOR_0912   | <0.59       | 32.10        | 5.91       | <0.24       | 1.09      | 20.71       | 95.84       | 4.00        | n.a.               | n.a.                 |
| 20210820_4-6MOR        | <0.59       | 32.02        | 5.15       | <0.24       | 1.47      | 20.97       | 102.84      | 3.89        | n.a.               | n.a.                 |

\*n.a. indicates that the parameter was not determined
