# Supplementary material for: Intermittent streamflow generation in a merokarst headwater catchment
Source: Royal Society of Chemistry journal article supplement (doi:10.1039/d2va00191h), 2022-11-23
Supplement: d2va00191h4.pdf [file d2va00191h4.pdf]

**Table SI5, Hatley et al.**

| Date*     | $\delta D$ (per mil VSMOW) | $\delta^{18}O$ (per mil VSMOW) |
|-----------|----------------------------|--------------------------------|
| 5/9/2021  | -6                         | -1.6                           |
| 5/9/2021  | -7                         | -2                             |
| 5/27/2021 | -10                        | -1.2                           |
| 5/27/2021 | -10                        | -1.3                           |
| 6/11/2021 | 12                         | 0                              |
| 6/24/2021 | -7                         | -1.3                           |
| 7/15/2021 | -22                        | -4.4                           |
| 7/15/2021 | -22                        | -4.4                           |

\*Repeated dates are duplicate samples coming from the same beaker of precipitation collected on the marked date. Samples that do not have repeated dates came from events that produced less than 10 mL of precipitation in our collector.
