# Supplementary material for: Intermittent streamflow generation in a merokarst headwater catchment
Source: Royal Society of Chemistry journal article supplement (doi:10.1039/d2va00191h), 2022-11-23
Supplement: d2va00191h5.pdf [file d2va00191h5.pdf]

Table S16, Hatley et al.

| Date/Time     | SO <sub>4</sub> <sup>--</sup> (mg/L) | Ca <sup>++</sup> /Mg <sup>++</sup> (concentration ratio) | Fraction Precipitation | Adjusted SO <sub>4</sub> <sup>--</sup> (mg/L) | Adjusted Ca <sup>++</sup> /Mg <sup>++</sup> (concentration ratio) | Stream Discharge (m <sup>3</sup> /s) | Fraction Eiss | Fraction Morrill | Fraction Soil |
|---------------|--------------------------------------|----------------------------------------------------------|------------------------|-----------------------------------------------|-------------------------------------------------------------------|--------------------------------------|---------------|------------------|---------------|
| 4/15/21 12:30 | 27.67                                | 5.48                                                     | 0.00                   | 27.67                                         | 5.48                                                              | 0.01                                 | 0.70          | 0.29             | 0.01          |
| 5/6/21 15:33  | 31.02                                | 5.59                                                     | 0.00                   | 31.02                                         | 5.59                                                              | 0.00                                 | 0.73          | 0.26             | 0.01          |
| 5/7/21 13:21  | 31.20                                | 5.80                                                     | 0.00                   | 31.20                                         | 5.80                                                              | 0.00                                 | 0.79          | 0.19             | 0.02          |
| 5/8/21 13:12  | 30.88                                | 5.21                                                     | 0.03                   | 31.78                                         | 5.21                                                              | 0.00                                 | 0.60          | 0.36             | 0.01          |
| 5/8/21 21:48  | 23.03                                | 5.42                                                     | 0.16                   | 27.17                                         | 5.41                                                              | 0.00                                 | 0.57          | 0.26             | 0.01          |
| 5/8/21 22:40  | 29.20                                | 5.22                                                     | 0.09                   | 31.91                                         | 5.22                                                              | 0.00                                 | 0.57          | 0.34             | 0.01          |
| 5/8/21 23:25  | 24.01                                | 5.09                                                     | 0.31                   | 33.92                                         | 5.08                                                              | 0.00                                 | 0.40          | 0.28             | 0.01          |
| 5/9/21 0:10   | 23.31                                | 5.33                                                     | 0.34                   | 34.33                                         | 5.32                                                              | 0.01                                 | 0.43          | 0.22             | 0.01          |
| 5/9/21 1:20   | 28.66                                | 4.87                                                     | 0.23                   | 36.94                                         | 4.86                                                              | 0.01                                 | 0.39          | 0.37             | 0.01          |
| 5/9/21 2:41   | 31.81                                | 5.10                                                     | 0.20                   | 39.57                                         | 5.09                                                              | 0.01                                 | 0.46          | 0.32             | 0.01          |
| 5/9/21 4:42   | 32.52                                | 5.21                                                     | 0.14                   | 37.76                                         | 5.21                                                              | 0.00                                 | 0.52          | 0.32             | 0.01          |
| 5/10/21 10:10 | 33.24                                | 5.28                                                     | 0.03                   | 34.21                                         | 5.28                                                              | 0.00                                 | 0.62          | 0.34             | 0.01          |
| 5/12/21 16:10 | 33.27                                | 5.19                                                     | 0.00                   | 33.27                                         | 5.19                                                              | 0.00                                 | 0.61          | 0.38             | 0.01          |
| 5/14/21 17:38 | 34.03                                | 5.36                                                     | 0.04                   | 35.47                                         | 5.36                                                              | 0.00                                 | 0.63          | 0.31             | 0.02          |
| 5/22/21 18:08 | 12.92                                | 5.88                                                     | 0.02                   | 13.18                                         | 5.88                                                              | 0.04                                 | 0.82          | 0.16             | 0.00          |
| 5/23/21 18:42 | 12.99                                | 5.85                                                     | 0.00                   | 12.99                                         | 5.85                                                              | 0.04                                 | 0.83          | 0.17             | 0.00          |
| 5/24/21 13:31 | 13.51                                | 5.67                                                     | 0.00                   | 13.51                                         | 5.67                                                              | 0.03                                 | 0.78          | 0.23             | 0.00          |
| 5/26/21 10:12 | 13.95                                | 5.55                                                     | 0.00                   | 13.95                                         | 5.55                                                              | 0.03                                 | 0.74          | 0.26             | 0.00          |
| 5/26/21 20:41 | 14.74                                | 5.64                                                     | 0.00                   | 14.74                                         | 5.64                                                              | 0.03                                 | 0.77          | 0.24             | 0.00          |
| 5/26/21 21:40 | 14.72                                | 5.75                                                     | 0.00                   | 14.72                                         | 5.75                                                              | 0.03                                 | 0.80          | 0.20             | 0.00          |
| 5/26/21 23:00 | 14.78                                | 5.79                                                     | 0.00                   | 14.78                                         | 5.79                                                              | 0.03                                 | 0.81          | 0.19             | 0.00          |
| 5/27/21 0:00  | 15.06                                | 5.66                                                     | 0.00                   | 15.06                                         | 5.66                                                              | 0.03                                 | 0.77          | 0.23             | 0.00          |
| 5/27/21 1:00  | 14.74                                | 5.77                                                     | 0.01                   | 14.89                                         | 5.77                                                              | 0.04                                 | 0.79          | 0.20             | 0.00          |
| 5/27/21 3:30  | 13.95                                | 5.69                                                     | 0.04                   | 14.50                                         | 5.69                                                              | 0.08                                 | 0.75          | 0.21             | 0.00          |
| 5/28/21 9:29  | 13.32                                | 5.86                                                     | 0.01                   | 13.46                                         | 5.86                                                              | 0.04                                 | 0.82          | 0.17             | 0.00          |
| 5/31/21 17:54 | 13.84                                | 5.83                                                     | 0.01                   | 13.98                                         | 5.83                                                              | 0.04                                 | 0.81          | 0.18             | 0.00          |
| 6/1/21 11:50  | 13.85                                | 5.63                                                     | 0.02                   | 14.14                                         | 5.63                                                              | 0.03                                 | 0.75          | 0.24             | 0.00          |
| 6/8/21 17:11  | 16.48                                | 5.46                                                     | 0.00                   | 16.48                                         | 5.46                                                              | 0.02                                 | 0.71          | 0.29             | 0.00          |
| 6/11/21 13:32 | 18.12                                | 5.46                                                     | 0.00                   | 18.12                                         | 5.46                                                              | 0.01                                 | 0.71          | 0.29             | 0.00          |
| 6/11/21 14:29 | 18.13                                | 5.40                                                     | 0.01                   | 18.28                                         | 5.40                                                              | 0.01                                 | 0.68          | 0.31             | 0.00          |
| 6/11/21 15:30 | 18.42                                | 5.55                                                     | 0.00                   | 18.42                                         | 5.55                                                              | 0.01                                 | 0.73          | 0.27             | 0.00          |
| 6/14/21 16:19 | 20.00                                | 5.20                                                     | 0.00                   | 20.00                                         | 5.20                                                              | 0.01                                 | 0.63          | 0.37             | 0.00          |
| 6/22/21 12:34 | 29.91                                | 4.83                                                     | 0.01                   | 30.24                                         | 4.83                                                              | 0.00                                 | 0.50          | 0.48             | 0.00          |
| 6/24/21 19:45 | 31.18                                | 4.48                                                     | 0.01                   | 31.53                                         | 4.48                                                              | 0.00                                 | 0.40          | 0.58             | 0.00          |
| 6/24/21 20:46 | 25.33                                | 4.56                                                     | 0.07                   | 27.13                                         | 4.56                                                              | 0.00                                 | 0.40          | 0.53             | 0.00          |
| 6/24/21 21:40 | 30.23                                | 4.43                                                     | 0.03                   | 31.10                                         | 4.43                                                              | 0.00                                 | 0.38          | 0.59             | 0.00          |
| 6/25/21 15:25 | 31.53                                | 4.76                                                     | 0.00                   | 31.53                                         | 4.76                                                              | 0.00                                 | 0.49          | 0.51             | 0.01          |
| 6/26/21 19:00 | 31.47                                | 4.55                                                     | 0.00                   | 31.47                                         | 4.55                                                              | 0.00                                 | 0.43          | 0.57             | 0.00          |
| 6/27/21 16:07 | 31.94                                | 4.46                                                     | 0.01                   | 32.30                                         | 4.46                                                              | 0.00                                 | 0.40          | 0.59             | 0.00          |
| 6/29/21 17:35 | 29.89                                | 4.78                                                     | 0.00                   | 29.89                                         | 4.78                                                              | 0.00                                 | 0.50          | 0.50             | 0.00          |
| 7/1/21 10:15  | 30.10                                | 4.78                                                     | 0.00                   | 30.10                                         | 4.78                                                              | 0.00                                 | 0.50          | 0.50             | 0.00          |
| 7/15/21 12:45 | 19.35                                | 5.70                                                     | 0.58                   | 43.65                                         | 5.68                                                              | 0.02                                 | 0.31          | 0.10             | 0.01          |
| 7/16/21 15:37 | 30.35                                | 4.95                                                     | 0.11                   | 34.02                                         | 4.94                                                              | 0.00                                 | 0.48          | 0.40             | 0.01          |
